# Supplementary material for: Transbilayer coupling of obstructed lipid diffusion in polymer-tethered phospholipid bilayers
Source: Royal Society of Chemistry journal article supplement (doi:10.1039/b800801a), 2008-01-01
Supplement: b800801a.pdf [file b800801a.pdf]

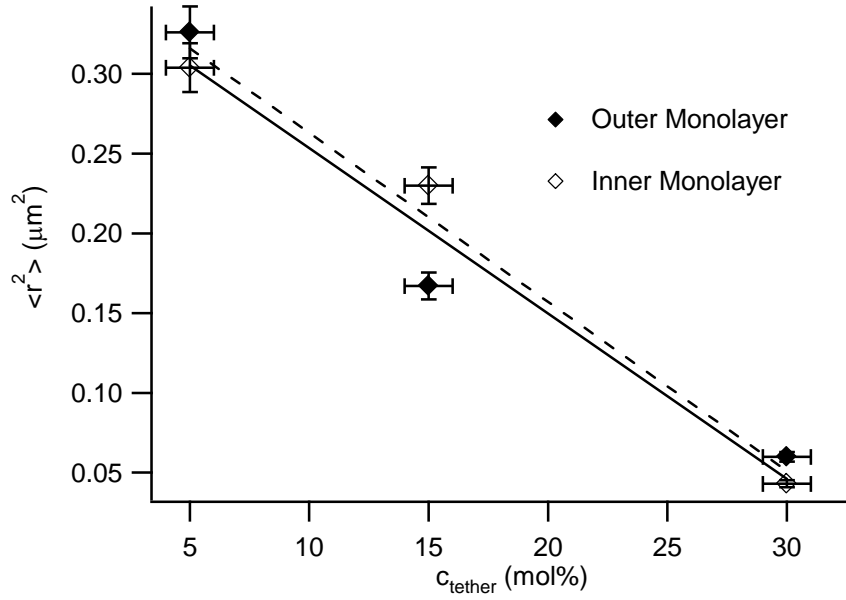

Coupling of obstructed TRITC-DHPE diffusion in polymer-tethered phospholipid bilayer illustrated in terms of  $\langle r^2 \rangle$ - $c_{tether}$  plots. Here the concentration of tethered lipids  $c_{tether}$  in the inner monolayer is kept constant at  $c_{tether} = 5\text{mol}\%$  and  $c_{tether}$  in the outer monolayer is varied between  $5 \leq c_{tether} \leq 30\text{mol}\%$ . Solid and dashed lines represent the best linear fits of inner and outer monolayer data, respectively.
